# Supplementary material for: The extraction of pyrethroid insecticides in juice and tea beverages by liquid-phase microextraction using deep eutectic solvents
Source: Royal Society of Chemistry journal article supplement (doi:10.1039/c9ay01518c), 2019-01-01
Supplement: c9ay01518c2.pdf [file c9ay01518c2.pdf]

Table S1 Analytical performance of the method for real samples (n=4), spike level: 10  $\mu\text{g L}^{-1}$ (low), 50  $\mu\text{g L}^{-1}$ (medium) and 100  $\mu\text{g L}^{-1}$ (high)

| litchi juice  |                                         |      | lemon juice      |                                         |      | Pear juice      |                                         |      |          |
|---------------|-----------------------------------------|------|------------------|-----------------------------------------|------|-----------------|-----------------------------------------|------|----------|
| pyrethroid    | Spike level<br>( $\mu\text{g L}^{-1}$ ) | RSD  | Recovery         | Spike level<br>( $\mu\text{g L}^{-1}$ ) | RSD  | Recovery        | Spike level<br>( $\mu\text{g L}^{-1}$ ) | RSD  | Recovery |
| deltamethrin  | 10                                      | 3.4% | 83.2%            | 10                                      | 4.8% | 82.6%           | 10                                      | 4.8% | 87.6%    |
|               | 50                                      | 4.1% | 82.8%            | 50                                      | 2.3% | 87.5%           | 50                                      | 4.3% | 82.3%    |
|               | 100                                     | 4.2% | 78.9%            | 100                                     | 2.7% | 88.9%           | 100                                     | 3.2% | 92.5%    |
| ethofenprox   | 10                                      | 2.9% | 81.1%            | 10                                      | 4.5% | 81.2%           | 10                                      | 4.2% | 82.4%    |
|               | 50                                      | 2.8% | 85.3%            | 50                                      | 3.2% | 87.3%           | 50                                      | 3.6% | 89.5%    |
|               | 100                                     | 4.7% | 91.2%            | 100                                     | 3.1% | 89.0%           | 100                                     | 2.8% | 86.1%    |
| bifenthrin    | 10                                      | 4.3% | 87.2%            | 10                                      | 4.8% | 81.3%           | 10                                      | 4.2% | 81.9%    |
|               | 50                                      | 3.5% | 80.4%            | 50                                      | 3.7% | 90.3%           | 50                                      | 3.1% | 89.2%    |
|               | 100                                     | 3.3% | 97.8%            | 100                                     | 2.9% | 92.3%           | 100                                     | 2.7% | 93.2%    |
| fenpropathrin | 10                                      | 4.1% | 81.3%            | 10                                      | 4.3% | 93.4%           | 10                                      | 3.4% | 87.3%    |
|               | 50                                      | 3.2% | 86.9%            | 50                                      | 4.5% | 102.3%          | 50                                      | 2.7% | 84.8%    |
|               | 100                                     | 2.2% | 89.3%            | 100                                     | 3.6% | 103.5%          | 100                                     | 3.5% | 89.1%    |
| grape juice   |                                         |      | grapefruit juice |                                         |      | Pineapple juice |                                         |      |          |
| pyrethroid    | Spike level<br>( $\mu\text{g L}^{-1}$ ) | RSD  | Recovery         | Spike level<br>( $\mu\text{g L}^{-1}$ ) | RSD  | Recovery        | Spike level<br>( $\mu\text{g L}^{-1}$ ) | RSD  | Recovery |
| deltamethrin  | 10                                      | 3.4% | 89.3%            | 10                                      | 4.7% | 97.6%           | 10                                      | 5.1% | 89.3%    |
|               | 50                                      | 4.1% | 81.2%            | 50                                      | 4.5% | 91.5%           | 50                                      | 4.2% | 90.6%    |
|               | 100                                     | 4.2% | 92.4%            | 100                                     | 4.5% | 89.4%           | 100                                     | 3.6% | 82.7%    |
| ethofenprox   | 10                                      | 2.9% | 87.5%            | 10                                      | 5.0% | 85.9%           | 10                                      | 4.3% | 96.4%    |
|               | 50                                      | 5.0% | 91.2%            | 50                                      | 4.8% | 92.1%           | 50                                      | 3.2% | 91.2%    |
|               | 100                                     | 4.7% | 93.5%            | 100                                     | 3.9% | 92.5%           | 100                                     | 3.4% | 90.3%    |
| bifenthrin    | 10                                      | 4.8% | 91.4%            | 10                                      | 4.8% | 94.2%           | 10                                      | 4.6% | 98.5%    |
|               | 50                                      | 4.3% | 95.7%            | 50                                      | 4.2% | 103.7%          | 50                                      | 3.6% | 103.2%   |
|               | 100                                     | 3.3% | 92.8%            | 100                                     | 3.5% | 98.1%           | 100                                     | 2.5% | 102.7%   |
| fenpropathrin | 10                                      | 5.1% | 89.6%            | 10                                      | 4.7% | 101.0%          | 10                                      | 3.9% | 95.5%    |
|               | 50                                      | 3.2% | 87.3%            | 50                                      | 4.1% | 98.3%           | 50                                      | 3.2% | 100.4%   |
|               | 100                                     | 2.2% | 92.3%            | 100                                     | 3.8% | 92.0%           | 100                                     | 2.5% | 92.7%    |
