# Supplementary material for: The extraction of pyrethroid insecticides in juice and tea beverages by liquid-phase microextraction using deep eutectic solvents
Source: Royal Society of Chemistry journal article supplement (doi:10.1039/c9ay01518c), 2019-01-01
Supplement: c9ay01518c3.pdf [file c9ay01518c3.pdf]

Table S2 Analytical performance data for pyrethroids by FE-LPME using DES in grape juice

| Pyrethroid    | Linear range<br>( $\mu\text{g L}^{-1}$ ) | Linearity equation | $r^2$  | RSD   | Enrichment factors | LOD ( $\mu\text{g L}^{-1}$ ) | Recovery |
|---------------|------------------------------------------|--------------------|--------|-------|--------------------|------------------------------|----------|
| deltamethrin  | 1.7-500                                  | $y=1.4532x-0.5467$ | 0.9983 | 2.86% | 103                | 0.50                         | 91.7%    |
| ethofenprox   | 3.0-500                                  | $y=2.0868x+3.6853$ | 0.9995 | 2.54% | 99                 | 0.82                         | 96.3%    |
| bifenthrin    | 2.7-500                                  | $y=2.4892x+0.4663$ | 0.9991 | 1.82% | 95                 | 0.76                         | 88.9%    |
| fenpropathrin | 4.5-500                                  | $y=2.5914x-0.2282$ | 0.9982 | 1.73% | 103                | 1.30                         | 94.9%    |

RSD: relative standard deviation;

LOD: limit of detection;

Spiked level for evaluating RSD and Recovery: 5  $\mu\text{g L}^{-1}$ , 20  $\mu\text{g L}^{-1}$  and 100  $\mu\text{g L}^{-1}$
