# Supplementary material for: The extraction of pyrethroid insecticides in juice and tea beverages by liquid-phase microextraction using deep eutectic solvents
Source: Royal Society of Chemistry journal article supplement (doi:10.1039/c9ay01518c), 2019-01-01
Supplement: c9ay01518c4.pdf [file c9ay01518c4.pdf]

Table S3 Analytical performance data for pyrethroids by FE-LPME using DES in tea beverages

| Pyrethroid    | Linear range<br>( $\mu\text{g L}^{-1}$ ) | Linearity equation | R <sup>2</sup> | RSD   | Enrichment<br>factors | LOD ( $\mu\text{g L}^{-1}$ ) | Recovery |
|---------------|------------------------------------------|--------------------|----------------|-------|-----------------------|------------------------------|----------|
| Deltamethrin  | 2.0-500                                  | y=1.4651x-0.7521   | 0.9995         | 2.31% | 101                   | 0.56                         | 87.5%    |
| Transfluthrin | 2.5-500                                  | y=1.6748x+3.9623   | 0.9990         | 2.79% | 103                   | 0.67                         | 96.7%    |
| Bifenthrin    | 3.0-500                                  | y=2.7923x+1.4365   | 0.9997         | 2.13% | 106                   | 0.87                         | 89.1%    |
| Fenpropathrin | 4.5-500                                  | y=2.3285x+1.7324   | 0.9988         | 1.89% | 102                   | 1.25                         | 95.3%    |

RSD: relative standard deviation;

LOD: limit of detection;

Spiked level for evaluating RSD and Recovery: 5  $\mu\text{g L}^{-1}$ , 20  $\mu\text{g L}^{-1}$  and 100  $\mu\text{g L}^{-1}$
