# Supplementary figures and images for: The extraction of pyrethroid insecticides in juice and tea beverages by liquid-phase microextraction using deep eutectic solvents
Source: Royal Society of Chemistry journal article supplement (doi:10.1039/c9ay01518c), 2019-01-01

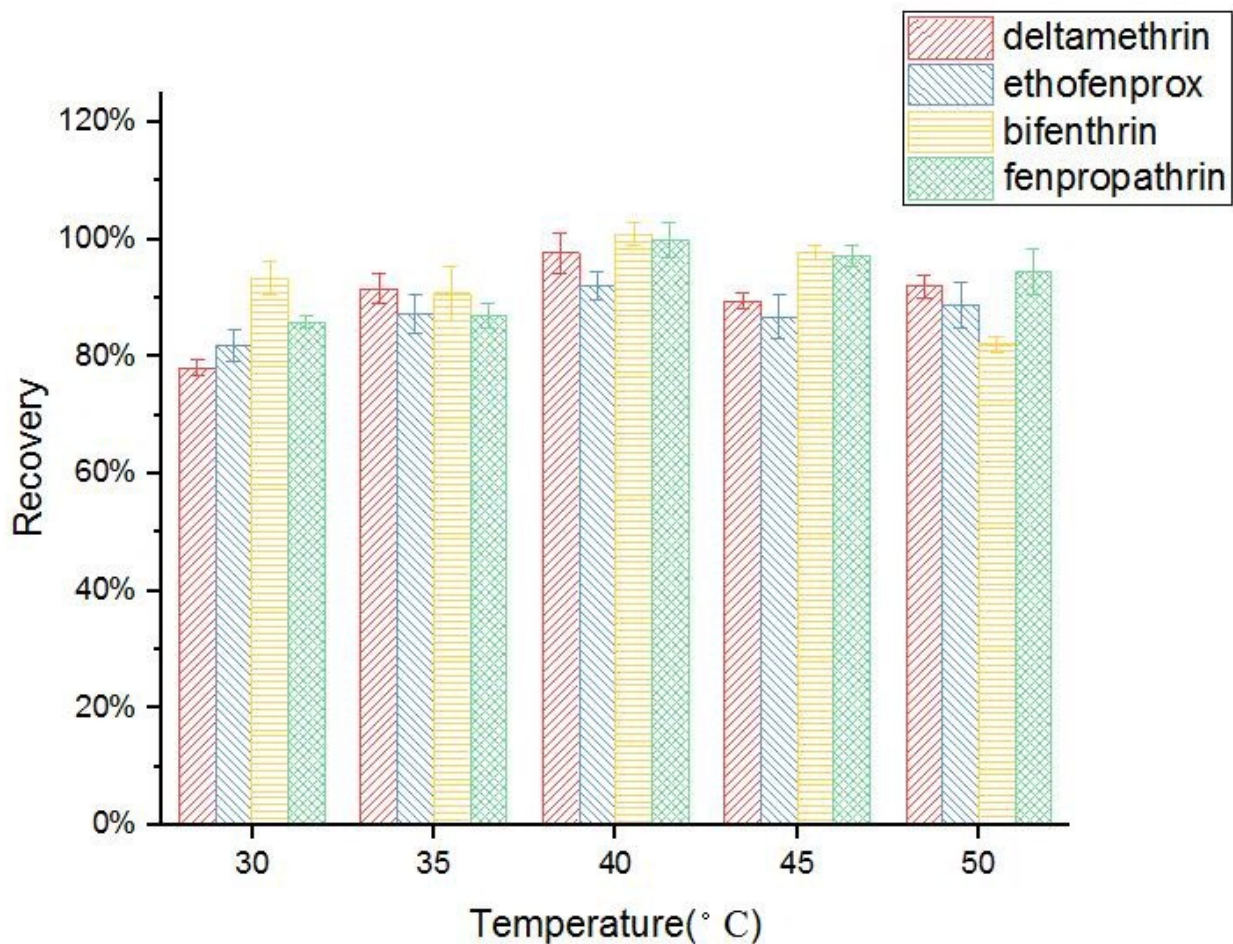

Supplement: c9ay01518c1.pdf [file c9ay01518c1.pdf]
